# Supplementary material for: Aza-boron-dipyrromethene dyes: TD-DFT benchmarks, spectral analysis and design of original near-IR structures
Source: Royal Society of Chemistry journal article supplement (doi:10.1039/c1cp22396h), 2011-11-09
Supplement: c1cp22396h.pdf [file c1cp22396h.pdf]

# **Aza-Boron-Dipyrromethene Dyes: TD-DFT Benchmarks, Spectral Analysis and Design of Original Near-IR Structures**

## **Electronic Supplementary Information**

Boris LE GUENNIC,<sup>\*,†</sup> Olivier MAURY,<sup>‡</sup> and Denis JACQUEMIN<sup>\*,¶</sup>

*Laboratoire des Sciences Chimiques de Rennes, UMR 6226 CNRS-Université de Rennes 1, 35042  
Rennes cedex, France., Université de Lyon, CNRS, Institut de Chimie de Lyon, Ecole Normale  
Supérieure de Lyon, 15 Parvis René Descartes, 69342 Lyon Cedex 07, France, and Laboratoire  
CEISAM - UMR 6230, 2 Rue de la Houssinière, BP 92208, 44322 Nantes Cedex 3, France*

E-mail: boris.leguennic@univ-rennes1.fr; Denis.Jacquemin@univ-nantes.fr

---

\*To whom correspondence should be addressed

† Sciences Chimiques, Rennes

‡ ENS de Lyon

¶ CEISAM, Nantes

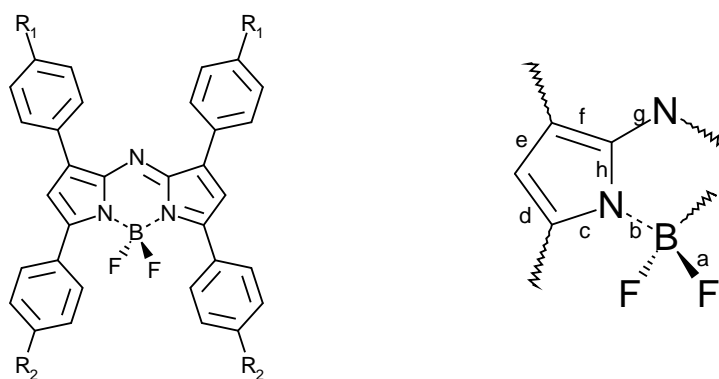

Scheme ESI-1: Representation of the aza-BODIPY dyes investigated herein.

Table ESI-1: Impact of the atomic basis set on the computed transition wavelengths (in nm) and oscillator strengths (between brackets). The structure, **1**, corresponds to R<sub>1</sub>=R<sub>2</sub>=H in Scheme ESI-1 has been used. All calculations have been performed at the PCM(CHCl<sub>3</sub>)-TD-PBE0/**X**/PCM(CHCl<sub>3</sub>)-PBE0/6-311G(d,p) level of approximation. Only the major bands ( $f > 0.1$ ) are reported.

| Basis ( <b>X</b> ) | $\lambda_1 (f_1)$ | $\lambda_2 (f_2)$ | $\lambda_3 (f_3)$ |
|--------------------|-------------------|-------------------|-------------------|
| 6-31G              | 564 (0.90)        | 449 (0.41)        | 355 (0.19)        |
| 6-31G(d)           | 583 (0.87)        | 453 (0.37)        | 357 (0.19)        |
| 6-31G(d,p)         | 583 (0.87)        | 453 (0.37)        | 357 (0.19)        |
| 6-31+G(d)          | 593 (0.87)        | 455 (0.39)        | 358 (0.19)        |
| 6-31++G(d,p)       | 593 (0.87)        | 455 (0.39)        | 358 (0.19)        |
| 6-31+G(2d)         | 598 (0.86)        | 455 (0.38)        | 358 (0.19)        |
| 6-31+G(2d,p)       | 598 (0.86)        | 455 (0.38)        | 358 (0.19)        |
| 6-31++G(2d,2p)     | 598 (0.86)        | 455 (0.38)        | 358 (0.19)        |
| 6-311G(d)          | 591 (0.87)        | 454 (0.38)        | 358 (0.19)        |
| 6-311G(d,p)        | 591 (0.87)        | 454 (0.38)        | 357 (0.19)        |
| 6-311+G(d)         | 596 (0.87)        | 456 (0.39)        | 358 (0.19)        |
| 6-311++G(d,p)      | 597 (0.87)        | 455 (0.39)        | 358 (0.19)        |
| 6-311+G(2d,p)      | 599 (0.86)        | 455 (0.38)        | 358 (0.19)        |
| 6-311++G(2d,2p)    | 599 (0.86)        | 455 (0.38)        | 358 (0.19)        |
| 6-311++G(2df,2pd)  | 600 (0.86)        | 455 (0.38)        | 358 (0.19)        |

Table ESI-2: Impact of the selected basis set on the bond lengths (in Å) for the compound of Table ESI-1. All calculations at the PCM(CHCl<sub>3</sub>)-PBE0/X.

| Basis (X)       | a     | b     | c     | d     | e     | f     | g     | h     |
|-----------------|-------|-------|-------|-------|-------|-------|-------|-------|
| 6-31G           | 1.437 | 1.547 | 1.372 | 1.417 | 1.391 | 1.435 | 1.323 | 1.404 |
| 6-31G(d)        | 1.388 | 1.565 | 1.358 | 1.414 | 1.384 | 1.435 | 1.316 | 1.389 |
| 6-31G(d,p)      | 1.389 | 1.565 | 1.358 | 1.414 | 1.384 | 1.435 | 1.316 | 1.389 |
| 6-31G(2d,2p)    | 1.381 | 1.561 | 1.356 | 1.413 | 1.383 | 1.433 | 1.315 | 1.387 |
| 6-311G(d)       | 1.393 | 1.561 | 1.356 | 1.412 | 1.382 | 1.433 | 1.316 | 1.388 |
| 6-311G(d,p)     | 1.393 | 1.561 | 1.356 | 1.412 | 1.382 | 1.433 | 1.316 | 1.388 |
| 6-311G(2d,p)    | 1.385 | 1.560 | 1.354 | 1.410 | 1.380 | 1.431 | 1.312 | 1.387 |
| 6-311G(2d,2p)   | 1.386 | 1.560 | 1.354 | 1.410 | 1.380 | 1.431 | 1.312 | 1.387 |
| 6-311++G(d,p)   | 1.397 | 1.559 | 1.357 | 1.412 | 1.383 | 1.433 | 1.314 | 1.389 |
| 6-311++G(2d,2p) | 1.388 | 1.559 | 1.355 | 1.410 | 1.380 | 1.431 | 1.312 | 1.388 |
| cc-pVTZ         | 1.387 | 1.563 | 1.354 | 1.410 | 1.379 | 1.431 | 1.312 | 1.387 |

Table ESI-3: Impact of the selected basis set on the valence angles (in degrees), see caption of Table ESI-2.

| Basis (X)       | $\alpha_{\text{FBF}}$ | $\alpha_{\text{BNC}}$ | $\alpha_{\text{NCN}}$ |
|-----------------|-----------------------|-----------------------|-----------------------|
| 6-31G           | 109.1                 | 122.0                 | 123.4                 |
| 6-31G(d)        | 111.5                 | 122.3                 | 124.2                 |
| 6-31G(d,p)      | 111.5                 | 122.3                 | 124.2                 |
| 6-31G(2d,2p)    | 111.3                 | 122.3                 | 124.3                 |
| 6-311G(d)       | 111.0                 | 122.1                 | 124.3                 |
| 6-311G(d,p)     | 111.0                 | 122.1                 | 124.3                 |
| 6-311G(2d,p)    | 111.1                 | 122.1                 | 124.3                 |
| 6-311G(2d,2p)   | 111.1                 | 122.1                 | 124.3                 |
| 6-311++G(d,p)   | 110.6                 | 122.1                 | 124.3                 |
| 6-311++G(2d,2p) | 110.9                 | 122.1                 | 124.2                 |
| cc-pVTZ         | 111.0                 | 122.1                 | 124.1                 |

Table ESI-4: Variations of the PCM(CHCl<sub>3</sub>)-TD-PBE0/6-311+G(2d,p) transition wavelengths as a function of the basis set used to optimize the geometry.

| Basis (X)       | $\lambda_1 (f_1)$ | $\lambda_2 (f_2)$ | $\lambda_3 (f_3)$ |
|-----------------|-------------------|-------------------|-------------------|
| 6-31G           | 622 (0.85)        | 471 (0.39)        | 367 (0.20)        |
| 6-31G(d)        | 604 (0.86)        | 458 (0.38)        | 358 (0.20)        |
| 6-31G(d,p)      | 604 (0.86)        | 458 (0.38)        | 359 (0.19)        |
| 6-31G(2d,2p)    | 602 (0.86)        | 456 (0.37)        | 358 (0.20)        |
| 6-311G(d)       | 598 (0.87)        | 455 (0.38)        | 358 (0.19)        |
| 6-311G(d,p)     | 599 (0.86)        | 455 (0.38)        | 358 (0.19)        |
| 6-311G(2d,p)    | 596 (0.87)        | 453 (0.37)        | 356 (0.19)        |
| 6-311G(2d,2p)   | 597 (0.87)        | 453 (0.37)        | 356 (0.19)        |
| 6-311++G(d,p)   | 595 (0.86)        | 455 (0.38)        | 359 (0.19)        |
| 6-311++G(2d,2p) | 594 (0.87)        | 453 (0.37)        | 357 (0.19)        |
| cc-pVTZ         | 594 (0.87)        | 453 (0.37)        | 356 (0.19)        |

Table ESI-5: Structural parameters (bond lengths in Å, valence angles in degrees), obtained for the R<sub>1</sub>=H, R<sub>2</sub>=Br derivative (see Scheme ESI-1 or 2 in Scheme 1). The experimental values are taken from literature.<sup>1</sup> All values are computed with the 6-311G(2d,p) basis set without solvent effect.

| Functional           | Bond lengths |       |       |       |       |       |       |       |                       |                       | Valence angles        |  |  |
|----------------------|--------------|-------|-------|-------|-------|-------|-------|-------|-----------------------|-----------------------|-----------------------|--|--|
|                      | a            | b     | c     | d     | e     | f     | g     | h     | $\alpha_{\text{FBF}}$ | $\alpha_{\text{BNC}}$ | $\alpha_{\text{NCN}}$ |  |  |
| Experiment (1)       | 1.392        | 1.557 | 1.368 | 1.418 | 1.362 | 1.438 | 1.327 | 1.398 | 110.1                 | 121.6                 | 124.5                 |  |  |
| Experiment (2)       | 1.377        | 1.564 | 1.365 | 1.398 | 1.390 | 1.433 | 1.322 | 1.401 |                       | 121.3                 | 124.0                 |  |  |
| Experiment (average) | 1.384        | 1.561 | 1.366 | 1.408 | 1.376 | 1.435 | 1.325 | 1.399 | 110.1                 | 121.4                 | 124.2                 |  |  |
| PBE                  | 1.398        | 1.573 | 1.371 | 1.421 | 1.390 | 1.444 | 1.325 | 1.397 | 111.6                 | 122.1                 | 124.4                 |  |  |
| TPSS                 | 1.396        | 1.572 | 1.372 | 1.418 | 1.389 | 1.441 | 1.325 | 1.397 | 111.4                 | 122.2                 | 124.3                 |  |  |
| TPSSh                | 1.390        | 1.568 | 1.364 | 1.415 | 1.384 | 1.436 | 1.320 | 1.392 | 111.4                 | 122.2                 | 124.3                 |  |  |
| O3LYP                | 1.385        | 1.575 | 1.357 | 1.414 | 1.383 | 1.437 | 1.317 | 1.390 | 112.1                 | 122.2                 | 124.3                 |  |  |
| B3LYP                | 1.388        | 1.569 | 1.360 | 1.414 | 1.383 | 1.436 | 1.317 | 1.394 | 111.4                 | 122.1                 | 124.2                 |  |  |
| PBE0                 | 1.382        | 1.563 | 1.353 | 1.411 | 1.379 | 1.431 | 1.323 | 1.385 | 111.6                 | 122.2                 | 124.3                 |  |  |
| BMK                  | 1.378        | 1.559 | 1.348 | 1.420 | 1.383 | 1.437 | 1.312 | 1.388 | 111.5                 | 122.3                 | 124.1                 |  |  |
| M05-2X               | 1.383        | 1.567 | 1.346 | 1.413 | 1.378 | 1.428 | 1.310 | 1.390 | 111.6                 | 122.5                 | 124.4                 |  |  |
| LC-PBE               | 1.373        | 1.547 | 1.327 | 1.401 | 1.363 | 1.413 | 1.299 | 1.379 | 111.5                 | 122.5                 | 124.0                 |  |  |
| LC- $\omega$ PBE     | 1.383        | 1.564 | 1.335 | 1.410 | 1.371 | 1.423 | 1.308 | 1.335 | 111.9                 | 122.6                 | 124.1                 |  |  |
| CAM-B3LYP            | 1.381        | 1.563 | 1.346 | 1.410 | 1.376 | 1.427 | 1.310 | 1.391 | 111.4                 | 122.3                 | 124.0                 |  |  |
| $\omega$ B97         | 1.394        | 1.573 | 1.343 | 1.417 | 1.379 | 1.429 | 1.314 | 1.396 | 111.6                 | 122.4                 | 124.3                 |  |  |
| $\omega$ B97X        | 1.387        | 1.569 | 1.342 | 1.414 | 1.377 | 1.427 | 1.311 | 1.393 | 111.7                 | 122.4                 | 124.2                 |  |  |
| $\omega$ B97XD       | 1.383        | 1.567 | 1.344 | 1.412 | 1.378 | 1.426 | 1.309 | 1.389 | 111.6                 | 122.5                 | 124.3                 |  |  |

Table ESI-6: Structural parameters (bond lengths in Å, valence angles in degrees), obtained for the R<sub>1</sub>=H, R<sub>2</sub>=OMe derivative (see Scheme ESI-1 or **3** in Scheme 1). The experimental values are taken from literature.<sup>2</sup> All values are computed with the 6-311G(2d,p) basis set without solvent effect.

| Functional           | Bond lengths |       |       |       |       |       |       |       |       |                  |                  | Valence angles   |  |  |
|----------------------|--------------|-------|-------|-------|-------|-------|-------|-------|-------|------------------|------------------|------------------|--|--|
|                      | a            | b     | c     | d     | e     | f     | g     | h     | h     | α <sub>FBF</sub> | α <sub>BNC</sub> | α <sub>NCN</sub> |  |  |
| Experiment (1)       | 1.365        | 1.563 | 1.360 | 1.399 | 1.376 | 1.436 | 1.317 | 1.409 | 1.409 | 110.1            | 121.5            | 124.9            |  |  |
| Experiment (2)       | 1.376        | 1.562 | 1.360 | 1.408 | 1.374 | 1.426 | 1.326 | 1.396 | 1.396 |                  | 122.6            | 124.2            |  |  |
| Experiment (average) | 1.371        | 1.562 | 1.360 | 1.404 | 1.375 | 1.431 | 1.321 | 1.402 | 1.402 | 110.1            | 122.0            | 124.6            |  |  |
| PBE                  | 1.400        | 1.572 | 1.374 | 1.422 | 1.390 | 1.443 | 1.325 | 1.397 | 1.397 | 111.3            | 121.9            | 124.4            |  |  |
| TPSS                 | 1.399        | 1.571 | 1.375 | 1.420 | 1.388 | 1.440 | 1.326 | 1.398 | 1.398 | 111.0            | 122.0            | 124.4            |  |  |
| TPSSh                | 1.392        | 1.567 | 1.367 | 1.416 | 1.383 | 1.435 | 1.320 | 1.393 | 1.393 | 111.1            | 122.1            | 124.4            |  |  |
| O3LYP                | 1.387        | 1.574 | 1.360 | 1.416 | 1.382 | 1.436 | 1.328 | 1.390 | 1.390 | 111.8            | 121.9            | 124.4            |  |  |
| B3LYP                | 1.390        | 1.568 | 1.362 | 1.416 | 1.382 | 1.435 | 1.317 | 1.394 | 1.394 | 111.1            | 121.9            | 124.2            |  |  |
| PBE0                 | 1.384        | 1.562 | 1.355 | 1.413 | 1.378 | 1.430 | 1.313 | 1.386 | 1.386 | 111.3            | 122.0            | 124.4            |  |  |
| BMK                  | 1.380        | 1.557 | 1.350 | 1.421 | 1.382 | 1.436 | 1.313 | 1.389 | 1.389 | 111.2            | 122.2            | 124.1            |  |  |
| M05-2X               | 1.385        | 1.566 | 1.348 | 1.416 | 1.376 | 1.428 | 1.311 | 1.390 | 1.390 | 111.4            | 122.3            | 124.6            |  |  |
| LC-PBE               | 1.375        | 1.547 | 1.329 | 1.404 | 1.362 | 1.413 | 1.299 | 1.379 | 1.379 | 111.2            | 122.3            | 124.1            |  |  |
| LC-ωPBE              | 1.385        | 1.564 | 1.338 | 1.412 | 1.370 | 1.423 | 1.307 | 1.390 | 1.390 | 111.7            | 122.3            | 124.2            |  |  |
| CAM-B3LYP            | 1.384        | 1.562 | 1.348 | 1.413 | 1.375 | 1.427 | 1.310 | 1.391 | 1.391 | 111.2            | 122.1            | 124.1            |  |  |
| ωB97                 | 1.396        | 1.572 | 1.346 | 1.420 | 1.377 | 1.429 | 1.314 | 1.396 | 1.396 | 111.4            | 122.1            | 124.4            |  |  |
| ωB97X                | 1.389        | 1.568 | 1.345 | 1.417 | 1.375 | 1.426 | 1.311 | 1.393 | 1.393 | 111.4            | 122.0            | 124.3            |  |  |
| ωB97XD               | 1.386        | 1.566 | 1.348 | 1.415 | 1.376 | 1.425 | 1.309 | 1.390 | 1.390 | 111.5            | 122.0            | 124.4            |  |  |



Table ESI-7: List of major computed bands for **4** with a PCM(CH<sub>2</sub>Cl<sub>2</sub>)-TD-X/6-311+G(2d,p)//PCM(CH<sub>2</sub>Cl<sub>2</sub>)-PBE0/6-311G(2d,p) scheme. All values in nm. Experimental values are from.<sup>3</sup>

| Functional       | $\lambda_1 (f_1)$ | $\lambda_2 (f_2)$ | $\lambda_3 (f_3)$       | $\lambda_4 (f_4)$ |
|------------------|-------------------|-------------------|-------------------------|-------------------|
| PBE              | 1267 (0.54)       | 1083 (0.56)       | 659 (0.60)              |                   |
| TPSS             | 1212 (0.55)       | 1042 (0.57)       | 645 (0.61)              |                   |
| TPSSh            | 1021 (0.62)       | 888 (0.60)        | 610 (0.55) & 497 (0.44) | 423 (1.30)        |
| O3LYP            | 1011 (0.62)       | 880 (0.58)        | 612 (0.54) & 499 (0.43) | 424 (1.36)        |
| B3LYP            | 885 (0.76)        | 764 (0.64)        | 584 (0.42) & 471 (0.46) | 395 (1.84)        |
| PBE0             | 834 (0.85)        | 712 (0.68)        | 565 (0.35) & 454 (0.47) | 379 (2.04)        |
| M06              | 810 (0.91)        | 622 (0.68)        | 457 (0.47)              | 381 (1.93)        |
| BMK              | 711 (1.14)        | 562 (0.89)        | 411 (0.43)              | 343 (2.32)        |
| M05-2X           | 688 (1.22)        | 493 (1.17)        | 394 (0.34)              | 329 (2.24)        |
| LC-PBE           | 672 (1.19)        |                   |                         | 361 (2.62)        |
| LC- $\omega$ PBE | 669 (1.18)        |                   |                         | 369 (2.41)        |
| CAM-B3LYP        | 679 (1.21)        | 467 (1.31)        | 394 (0.23)              | 328 (2.09)        |
| $\omega$ B97     | 673 (1.18)        |                   |                         | 369 (2.46)        |
| $\omega$ B97X    | 665 (1.19)        |                   |                         | 382 (2.31)        |
| $\omega$ B97XD   | 662 (1.21)        |                   |                         | 417 (1.97)        |
| Exp              | 745 (m)           | 623 (w)           | 482 (vw)                | 359 (s)           |

Table ESI-8: List of major computed bands for **5** with a PCM(CH<sub>2</sub>Cl<sub>2</sub>)-TD-X/6-311+G(2d,p)//PCM(CH<sub>2</sub>Cl<sub>2</sub>)-PBE0/6-311G(2d,p) scheme. All values in nm. Experimental values are from.<sup>1</sup>

| Functional       | $\lambda_1 (f_1)$ | $\lambda_2 (f_2)$       | $\lambda_3 (f_3)$ |
|------------------|-------------------|-------------------------|-------------------|
| PBE              | 852.4 (0.92)      | 706 (1.03)              |                   |
| TPSS             | 829 (0.95)        | 687 (1.07)              |                   |
| TPSSh            | 750 (1.09)        | 619 (0.63)              | 571 (0.74)        |
| O3LYP            | 751 (1.09)        | 617 (0.64)              | 572 (0.73)        |
| B3LYP            | 713 (1.18)        | 559 (0.97)              | 505(0.82)         |
| PBE0             | 690 (1.22)        | 526 (1.14)              | 460 (0.83)        |
| M06              | 701 (1.20)        | 521 (1.28)              | 463 (0.89)        |
| BMK              | 647 (1.27)        | 448 (1.61)              | 379 (1.54)        |
| M05-2X           | 649 (1.24)        | 417 (2.09)              | 349 (1.57)        |
| LC-PBE           | 655 (1.17)        | 353 (1.90)              | 326 (2.25)        |
| LC- $\omega$ PBE | 652 (1.16)        | 362 (1.60)              | 333 (2.45)        |
| CAM-B3LYP        | 648(1.22)         | 414 (1.99) & 382 (0.72) | 349 (1.15)        |
| $\omega$ B97     | 657 (1.16)        | 362 (1.75)              | 333 (2.32)        |
| $\omega$ B97X    | 647 (1.18)        | 374 (1.64)              | 343 (2.33)        |
| $\omega$ B97XD   | 641 (1.20)        | 400 (1.51)              | 364 (2.03)        |
| Exp              | 694 (s)           | 492 (m)                 | 373 (s)           |

## References

- (1) Bellier, Q.; Pegaz, S.; Aronica, C.; Le Guennic, B.; Andraud, C.; Maury, O. *Org. Lett.* **2011**, *13*, 22–25.
- (2) Killoran, J.; Allen, L.; Gallagher, J.; Gallagher, W.; O’Shea, D. *Chem. Comm.* **2002**, 1862–1863.
- (3) Bouit, P. A.; Kamada, K.; Feneyrou, P.; Berginc, G.; Toupet, L.; Maury, O.; Andraud, C. *Adv. Mater.* **2009**, *21*, 1151–1154.
